# Supplementary material for: The Effects of an Anti-inflammatory Diet Alone or in Combination with Acupuncture on Mental Health, Anthropometric Indices, and Metabolic Status in Diabetic Patients with Depression: A Randomized, Controlled Clinical Trial
Source: Research Square preprint supplement (doi:10.21203/rs.3.rs-4367363/v1), 2024-06-25
Supplement: Supplementary file 1 [file 85eb38b70b8ed1669efc56f0.docx]

**Table 1- Visit Descriptions at the beginning and throughout the study**

| **Time** | **Assessments** |
| --- | --- |
| Visit 0 | Screening for depression |
| Visit 1 (baseline) | The assessments of (i) anthropometric indices, (ii) dietary intake, (iii) physical activity, (iv) biochemical assessment, and (vi) anxiety. |
| Visit 2 (at the end of the fourth week) | The assessment of (i) anthropometric indices, and (ii) dietary intake. |
| Visit 3 (at the end of the study) | The assessment of (i) anthropometric indices, (ii) physical activity, (iv) dietary intake, (v) biochemical assessment, and (vi) mental assessment. |

**Table 2- Demographic information of the participants**

|  | | **Acupuncture +diet**  **n=29** | **Diet alone**  **n=24** | **Standard treatment (Control)**  **n=30** | **P-value** |
| --- | --- | --- | --- | --- | --- |
| age | | 47.7 ± 3.08 | 48.23 ± 3.9 | 47.77 ± 2.9 | 0.810 a |
| salediabet | | 10.29 ± 7.91 | 9.8 ± 7.79 | 8.67 ± 6.02 | 0.859 a |
| sleep.duration | | 7.1 ± 1.42 | 7.17 ± 1.42 | 7.7 ± 1.21 | 0.879 a |
| khabenimrooz | | 0.77 ± 0.73 | 0.8 ± 0.82 | 0.55 ± 0.55 | 0.957 a |
| education | Illiterate | 0 (0) | 1 (3.3) | 0 (0) | 0.712 b |
| Under diploma | 10 (33.3) | 10 (33.3) | 7 (23.3) |
| Diploma | 14 (46.7) | 11 (36.7) | 14 (46.7) |
| MSc and higher | 6 (20) | 8 (26.7) | 9 (30) |
| Marital Status | Single | 1 (3.3) | 2 (6.7) | 2 (6.7) | 0.352 b |
| Married | 27 (90) | 28 (93.3) | 28 (93.3) |
| Widow/Divorced | 2 (6.7) | 0 (0) | 0 (0) |
| Family history  of diabetes | Yes | 24 (80) | 20 (66.7) | 16 (53.3) | 0.091 b |
| No | 6 (20) | 10 (33.3) | 14 (46.7) |
| Other disease history | yes | 22 (73.3) | 20 (66.7) | 5 (17.2) | <0.001 b |
| no | 8 (26.7) | 10 (33.3) | 24 (82.8) |
| no | 18 (60) | 18 (60) | 25 (86.2) |
| Allergy | yes | 6 (20) | 1 (3.3) | 0 (0) | 0.008 b |
| no | 24 (80) | 29 (96.7) | 30 (100) |

a, Mann-Whitney U test, b, Pearson Chi-Square test

**Table 3-** **Comparison of anthropometric indices between the treatment groups and within the follow-up period.**

| **Variable** | **Time** | **Acp + Diet**  **(a)** | **Diet alone**  **(b)** | **Control**  **(c)** | **P**  **Within a** | **P**  **Within b** | **P**  **Within c** | **P Between at Baseline** | **P Between at Middle** | **P Between at End** |
| --- | --- | --- | --- | --- | --- | --- | --- | --- | --- | --- |
| Fat Mass (%) | Baseline | 41.92 ± 8.13 | 42.88 ± 7 | 43.09 ± 3.24 | P 12= 0.587  P 13= 0.003  P 23= 0.067 | P 12= 0.583  P 13= 0.306  P 23= 0.482 | P 12= 0.177  P 13= 0.101  P 23= 0.004 | P ab= 0.593  P ac= 0.857  P bc= 0.667 | P ab= 0.523  P ac= 0.839  P bc= 0.635 | P ab= 0.059  P ac= 0.801  P bc= 0.068 |
| Middle | 42.31 ± 6.88 | 43.6 ± 6.04 | 43.49 ± 3.1 |
| End | 40.8 ± 8.16 | 44.01 ± 4.36 | 42.31 ± 3.79 |
| Muscle Mass (kg) | Baseline | 25.62 ± 4.02 | 25.06 ± 3.47 | 24.57 ± 1.7 | P 12= 0.350  P 13= 0.181  P 23= 0.117 | P 12= 0.510  P 13= 0.137  P 23= 0.307 | P 12= 0.965  P 13= 0.070  P 23= 0.052 | P ab= 0.554  P ac= 0.361  P bc= 0.741 | P ab= 0.607  P ac= 0.645  P bc= 0.931 | P ab= 0.065  P ac= 0.539  P bc= 0.147 |
| Middle | 25.21 ± 3.48 | 24.68 ± 2.93 | 24.58 ± 1.44 |
| End | 25.89 ± 4.05 | 24.25 ± 2.39 | 25.02 ± 1.71 |
| Visceral Fat | Baseline | 11.07 ± 4.7 | 9.57 ± 2.93 | 8.38 ± 1.86 | P 12= 0.013  P 13= 0.011  P 23= 0.280 | P 12= 0.020  P 13= 0.014  P 23= 0.788 | P 12= 0.555  P 13= 0.949  P 23= 0.795 | P ab= 0.123  P ac= 0.001  P bc= 0.040 | P ab= 0.260  P ac= 0.095  P bc= 0.603 | P ab= 0.101  P ac= 0.032  P bc= 0.518 |
| Middle | 9.33 ± 3.12 | 8.58 ± 2.06 | 8.44 ± 1.98 |
| End | 9.93 ± 3.93 | 8.58 ± 2.02 | 8.4 ± 2.02 |
| Weight (Kg) | Baseline | 80.91 ± 13.86 | 79.01 ± 11.91 | 77.09 ± 10.05 | P 12= 0.005  P 13 < 0.001  P 23= 0.520 | P 12= 0.799  P 13= 0.056  P 23= 0.067 | P 12= 0.749  P 13= 0.536  P 23= 0.602 | P ab= 0.502  P ac= 0.069  P bc= 0.302 | P ab= 0.670  P ac= 0.543  P bc= 0.324 | P ab= 0.643  P ac= 0.374  P bc= 0.678 |
| Middle | 77.17 ± 12.89 | 78.51 ± 10.97 | 77.04 ± 9.97 |
| End | 77.8 ± 13.85 | 76.72 ± 11.05 | 77.01 ± 10.45 |
| Waist circumference  (cm) | Baseline | 101.82 ± 7.51 | 106.72 ± 10.43 | 92.9 ± 11.61 | P 12 < 0.001  P 13 < 0.001  P 23= 0.863 | P 12= 0.285  P 13= 0.113  P 23= 0.180 | P 12= 0.724  P 13= 0.913  P 23= 0.233 | P ab= 0.042  P ac < 0.001  P bc < 0.001 | P ab= 0.001  P ac= 0.055  P bc < 0.001 | P ab= 0.003  P ac= 0.049  P bc < 0.001 |
| Middle | 97.64 ± 8.23 | 105.69 ± 9.9 | 93.19 ± 10.78 |
| End | 97.39 ± 8.31 | 105.12 ± 10.35 | 92.77 ± 10.95 |
| Hip Circumference (cm) | Baseline | 112.22 ± 8.33 | 110.52 ± 8.95 | 108.47 ± 6.23 | P 12= 0.001  P 13 < 0.001  P 23= 0.335 | P 12= 0.470  P 13= 0.759  P 23= 0.268 | P 12= 0.353  P 13= 0.793  P 23= 0.204 | P ab= 0.377  P ac= 0.036  P bc= 0.348 | P ab= 0.797  P ac= 0.591  P bc= 0.490 | P ab= 0.886  P ac= 0.325  P bc= 0.345 |
| Middle | 109.4 ± 7.44 | 109.81 ± 8.51 | 108.71 ± 6.31 |
| End | 110.04 ± 8.56 | 110.38 ± 8.88 | 108.43 ± 6.16 |
| BMI (kg/m2) | Baseline | 31.79 ± 4.73 | 32.23 ± 3.65 | 30.76 ± 2.7 | P 12= 0.028  P 13 < 0.001  P 23= 0.717 | P 12= 0.699  P 13= 0.111  P 23= 0.220 | P 12= 0.758  P 13= 0.190  P 23= 0.220 | P ab= 0.715  P ac= 0.055  P bc= 0.017 | P ab= 0.217  P ac= 0.333  P bc= 0.022 | P ab= 0.332  P ac= 0.351  P bc= 0.049 |
| Middle | 30.78 ± 4.19 | 32.05 ± 3.31 | 30.74 ± 2.68 |
| End | 30.59 ± 4.78 | 31.69 ± 3.34 | 30.63 ± 2.86 |

Adjusted for age, duration of diabetes, and total energy

P 12: Within-group comparison of baseline and middle, P 13: Within-group comparison of baseline and end, P 23: Within-group comparison of middle and end.

P ab: Between-group comparison of a and b, P ac: Between-group comparison of a and c, P bc: Between-group comparison of b and c.

**Table 4- Comparison of depression, anxiety, and biochemistry markers between the treatment groups.**

| **Variable** | **Time** | **Acupuncture + Diet**  **(a)** | **Diet alone**  **(b)** | **Control**  **(c)** | **P ab** | **P ac** | **P bc** |
| --- | --- | --- | --- | --- | --- | --- | --- |
| Depression | Baseline | 13.9 ± 3.58 | 14.9 ± 4.58 | 15.13 ± 6.1 | 0.007 | 0.002 | 0.519 |
| End | 10.97 ± 4.74 | 14.36 ± 5.02 | 15.29 ± 6.38 |
| Anxiety | Baseline | 16.86 ± 6.33 | 16.03 ± 6.09 | 13.77 ± 3.62 | <0.001 | <0.001 | 0.687 |
| End | 13.36 ± 5.17 | 15.44 ± 6.08 | 13.5 ± 2.81 |
| FBS (mg/dL) | Baseline | 149.9 ± 36.45 | 154.23 ± 39.75 | 130.47 ± 24.15 | 0.258 | 0.974 | 0.296 |
| End | 143.07 ± 24.51 | 152.61 ± 30.39 | 131.53 ± 25.85 |
| HbA1c (%) | Baseline | 8.47 ± 1.29 | 8.6 ± 1.52 | 7.58 ± 0.91 | 0.008 | 0.030 | 0.813 |
| End | 7.65 ± 0.99 | 8.3 ± 1.35 | 7.36 ± 0.86 |
| TC (mg/dL) | Baseline | 132.57 ± 41.71 | 130.25 ± 38.17 | 123.35 ± 47.92 | 0.643 | 0.789 | 0.488 |
| End | 134.79 ± 33.52 | 139.22 ± 26.01 | 129.3 ± 32.8 |
| TG (mg/dL) | Baseline | 147.23 ± 57.35 | 165.93 ± 98.24 | 159.03 ± 101.47 | 0.481 | 0.248 | 0.071 |
| End | 140 ± 56.88 | 163.35 ± 84.49 | 137.8 ± 81.82 |
| HDL (mg/dL) | Baseline | 38.13 ± 5.46 | 42.07 ± 7.46 | 39.53 ± 10.65 | 0.027 | 0.086 | 0.691 |
| End | 38.46 ± 7.71 | 44.78 ± 6.31 | 40.4 ± 9.07 |
| LDL (mg/dL) | Baseline | 72.17 ± 28.54 | 79.34 ± 31.2 | 65.73 ± 30.55 | 0.234 | 0.511 | 0.662 |
| End | 73.41 ± 27.64 | 73.73 ± 27.03 | 64.77 ± 22.96 |
| hs-CRP (mg/L) | Baseline | 2.46 ± 3.45 | 2.45 ± 2.27 | 1.44 ± 0.6 | 0.639 | 0.810 | 0.639 |
| End | 1.83 ± 2.3 | 1.6 ± 1.05 | 1.41 ± 0.56 |

Adjusted for age, weight, duration of diabetes, total energy, and the outcome baseline value.

P ab: Between group comparison of a and b, P ac: Between group comparison of a and c, P bc: Between group comparison of b and c.

**Appendix 1-** **Comparison of nutritional (Energy residual adjusted) parameters between the treatment groups.**

| **Outcome** | **Time** | **Acupuncture + Diet**  **(a)** | **Diet alone**  **(b)** | **Control**  **(c)** | **P ab** | **P ac** | **P bc** |
| --- | --- | --- | --- | --- | --- | --- | --- |
| Total energy (Kcal/day) | Baseline | 2396.34 ± 381.16 | 2413.31 ± 326.29 | 1957.75 ± 321.58 | 0.252 | <0.001 | <0.001 |
| End | 1425.07 ± 284.65 | 1513.47 ± 311.99 | 1907.94 ± 314.05 |
| Carbohydrate (g/day) | Baseline | 209.21 ± 44.23 | 201.33 ± 41.76 | 247.71 ± 56.81 | 0.225 | <0.001 | <0.001 |
| End | 307.14 ± 73.21 | 325.78 ± 56.33 | 253.56 ± 60.74 |
| Protein (g/day) | Baseline | 92.85 ± 30.23 | 89.05 ± 21.02 | 64.09 ± 16.4 | 0.061 | 0.004 | 0.209 |
| End | 46.12 ± 21.46 | 55.89 ± 21.56 | 62.91 ± 15.8 |
| Fat (g/day) | Baseline | 105.78 ± 39.34 | 95.83 ± 34.34 | 84.21 ± 25.04 | 0.806 | <0.001 | <0.001 |
| End | 47.62 ± 18.96 | 49.19 ± 18.24 | 74.81 ± 24.14 |
| Polyunsaturated fatty acids (g/day) | Baseline | 18.22 ± 10.2 | 19.58 ± 9.36 | 28.85 ± 13.99 | 0.848 | 0.022 | 0.010 |
| End | 19.69 ± 23.42 | 16.17 ± 6.66 | 26.5 ± 14.13 |
| Monounsaturated fatty acids (g/day) | Baseline | 14.66 ± 6.88 | 16 ± 7.51 | 24.72 ± 9.98 | 0.828 | <0.001 | <0.001 |
| End | 12.05 ± 7 | 12.08 ± 5.66 | 23.99 ± 9.86 |
| Saturated fatty acids (g/day) | Baseline | 15.5 ± 7.65 | 15.96 ± 7.03 | 18.99 ± 9.44 | 0.604 | <0.001 | <0.001 |
| End | 10.66 ± 5 | 11.38 ± 6.13 | 17.33 ± 5.8 |
| Dietary Fiber (g/day) | Baseline | 11.2 ± 4.97 | 14.04 ± 6.62 | 15.42 ± 5.07 | 0.643 | 0.001 | <0.001 |
| End | 9.94 ± 5.01 | 10.09 ± 3.24 | 14.86 ± 5.03 |

Adjusted for age, duration of diabetes, and the outcome baseline value.
